# Supplementary material for: An Increased Dietary Supply of Medium-Chain Fatty Acids during Early Weaning in Rodents Prevents Excessive Fat Accumulation in Adulthood
Source: MDPI journal article supplement (doi:10.3390/nu9060631), 2017-06-20
Supplement: s1 [file s1]

Supplementary Figure S1

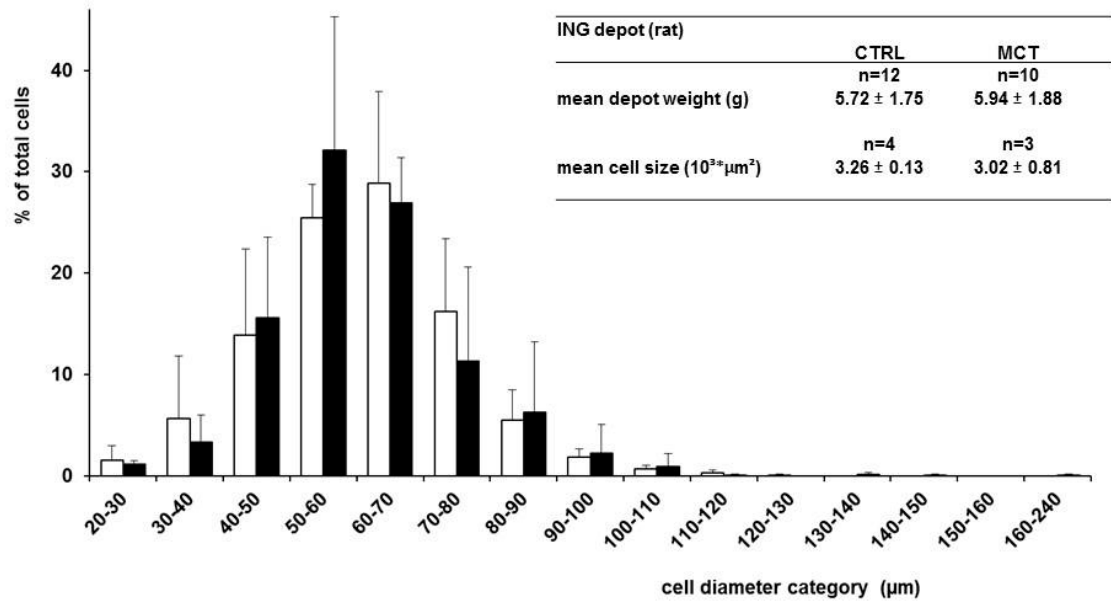

Figure S1. Frequency distribution of ING depot adipocyte cell size in CTRL ( $n = 4$ ; white bars) and MCT ( $n = 3$ ; black bars) rats on PN day 98. The table shows mean ING depot weight and cell size. Values are means  $\pm$  SD; ING, inguinal fat.

**Supplementary Table S1.** Composition of the experimental diets

| <b>A: Ingredients</b>                | <b>Early diet</b> |            | <b>WSD</b> |
|--------------------------------------|-------------------|------------|------------|
|                                      | <b>CTRL</b>       | <b>MCT</b> |            |
| <b>(g/kg)</b>                        |                   |            |            |
| Protein (20 w%)                      |                   |            |            |
| Sodium caseinate                     | 200               | 200        | 200        |
| Carbohydrates (60 w%)                |                   |            |            |
| Corn starch                          | 450               | 450        | 450        |
| Maltodextrin (DE19)                  | 150               | 150        | 150        |
| Fats (10 w%)                         |                   |            |            |
| Oil blend (see Table 1B and 1C)      | 100               | 100        | 50         |
| Lard                                 | 0                 | 0          | 50         |
| Cholesterol                          | 0                 | 0          | 1          |
| Fiber (5 w%)                         |                   |            |            |
| Cellulose (Vitacel L 600-20)         | 50                | 50         | 50         |
| Other (5 w%)                         |                   |            |            |
| Mineral mix                          | 35                | 35         | 35         |
| Vitamin mix                          | 10                | 10         | 10         |
| Choline bitartrate                   | 2.5               | 2.5        | 2.5        |
| L-cysteine                           | 3                 | 3          | 3          |
| Tertiary-butylhydroquinone           | 0.014             | 0.014      | 0.014      |
|                                      |                   |            |            |
| <b>B: Oil blend composition used</b> | <b>Early diet</b> |            | <b>WSD</b> |
|                                      | <b>CTRL</b>       | <b>MCT</b> |            |
| <b>(g/100 g)</b>                     |                   |            |            |
| Rapeseed oil (Canola)                | 30                | 30         | 15         |
| Sunflower HO oil                     | 8                 | 8          | 4          |
| Trisun80 oil                         | 6                 | 11         | 3          |
| Coconut oil                          | 24                | 3          | 12         |
| Palm oil                             | 32                | 27         | 16         |
| MCT mygliol oil                      | 0                 | 21         | 1          |
| Lard                                 | 0                 | 0          | 50         |
| Cholesterol                          | 0                 | 0          | 0.1        |

**Supplementary Table S2.** Mouse milk FA composition at PN day 12 and male pup erythrocyte FA composition at weaning on PN day 21

| (%FA)             | Milk         |              | Erythrocyte membrane |              |
|-------------------|--------------|--------------|----------------------|--------------|
|                   | CTRL         | MCT          | CTRL                 | MCT          |
| 8:0               | 0.09 ± 0.06  | 0.13 ± 0.10  | 0                    | 0            |
| 10:0              | 5.44 ± 0.62  | 5.09 ± 0.75  | 0                    | 0            |
| 12:0              | 12.02 ± 0.76 | 9.98 ± 1.19  | 0.10 ± 0.03          | 0.02 ± 0.01  |
| 14:0              | 12.16 ± 0.87 | 11.21 ± 0.78 | 0.67 ± 0.11          | 0.43 ± 0.06  |
| 16:0              | 23.84 ± 0.85 | 24.55 ± 0.81 | 32.14 ± 0.43         | 31.99 ± 0.53 |
| 18:0              | 1.93 ± 0.35  | 1.96 ± 0.12  | 0.13 ± 0.02          | 0.14 ± 0.02  |
| 18:1 $n$ -9 (OA)  | 27.78 ± 1.06 | 29.65 ± 2.02 | 16.15 ± 0.33         | 16.64 ± 0.46 |
| 18:2 $n$ -6 (LA)  | 6.17 ± 0.34  | 6.26 ± 0.66  | 7.94 ± 0.46          | 7.38 ± 0.32  |
| 18:3 $n$ -3 (ALA) | 0.61 ± 0.06  | 0.60 ± 0.04  | 0.21 ± 0.04          | 0.17 ± 0.02  |
| 20:4 $n$ -6 (AA)  | 0.52 ± 0.06  | 0.55 ± 0.08  | 14.02 ± 0.59         | 13.70 ± 0.29 |
| 20:5 $n$ -3 (EPA) | 0.13 ± 0.05  | 0.14 ± 0.03  | 0.47 ± 0.03          | 0.48 ± 0.03  |
| 22:6 $n$ -3 (DHA) | 0.20 ± 0.01  | 0.20 ± 0.02  | 6.13 ± 0.17          | 6.11 ± 0.20  |
| MCFA (C8:C12)     | 17.56 ± 1.27 | 15.21 ± 1.91 | 0.10 ± 0.03          | 0.02 ± 0.01  |
| SFA               | 55.56 ± 1.59 | 53.07 ± 2.69 | 42.29 ± 0.31         | 42.25 ± 0.53 |
| MUFA              | 34.87 ± 1.54 | 37.27 ± 2.13 | 21.25 ± 0.26         | 22.27 ± 0.61 |
| PUFA              | 9.47 ± 0.34  | 9.66 ± 0.69  | 34.50 ± 0.30         | 33.56 ± 0.36 |
| Total $n$ -6      | 8.16 ± 0.31  | 8.36 ± 0.72  | 26.59 ± 0.34         | 25.76 ± 0.28 |
| Total $n$ -3      | 1.19 ± 0.04  | 1.18 ± 0.03  | 7.92 ± 0.17          | 7.80 ± 0.21  |

Values are means ± SD; n=4-9 per group.

Supplementary Table S3. Glucose and insulin dynamics in fasting state and during intravenous glucose and insulin tolerance tests in *rats*

|               |                           | CTRL<br>n=11-12 | MCT<br>n=7-8              |
|---------------|---------------------------|-----------------|---------------------------|
| PN 42 Fasted  | Fasting glucose (mM)      | 9.84 ± 1.51     | 8.37 ± 1.14*              |
|               | Fasting insulin (pM)      | 101.42 ± 56.6   | 107.60 ± 97.21            |
|               | HOMA-IR                   | 45.8 ± 28.5     | 39.7 ± 37.5               |
| PN 84 i.v.GTT | Fasting glucose (mM)      | 6.86 ± 0.99     | 7.02 ± 1.70               |
|               | Fasting insulin (pM)      | 341.93 ± 115.19 | 440.86 ± 203.80           |
|               | HOMA-IR                   | 85.4 ± 30.2     | 88.1 ± 30.9               |
|               | iAUC30glucose (mM*30min)  | 198.6 ± 64.9    | 150.4 ± 62.5 <sup>#</sup> |
|               | glucose max value (mM)    | 79.0 ± 28.5     | 67.8 ± 25.5               |
|               | net glucose increase (mM) | 72.2 ± 28.1     | 60.8 ± 24.9               |
|               | iAUC30insulin (nM*30 min) | 10.95 ± 3.07    | 10.72 ± 4.88              |
|               | insulin max value (nM)    | 1.94 ± 0.46     | 2.16 ± 0.77               |
|               | net insulin increase (nM) | 1.60 ± 0.40     | 1.72 ± 0.63               |
| PN 90 i.v.IIT | Fasting glucose (mM)      | 5.59 ± 1.06     | 6.28 ± 2.15               |
|               | Fasting insulin (pM)      | 406.83 ± 116.82 | 505.52 ± 197.13           |
|               | HOMA-IR                   | 101.8 ± 44.8    | 138.6 ± 65.4              |
|               | glucose min value (mM)    | 2.75 ± 0.69     | 2.60 ± 0.95               |
|               | net glucose decrease (mM) | -2.83 ± 0.96    | -3.62 ± 1.34 <sup>#</sup> |
|               | dAUC60glucose (mM*60 min) | -72.6 ± 49.2    | -105.5 ± 73.4             |
| PN 98 Fasted  | Fasting glucose (mM)      | 12.67 ± 2.47    | 12.02 ± 2.46              |
|               | Fasting insulin (pM)      | 279.75 ± 235.49 | 251.95 ± 211.89           |
|               | HOMA-IR                   | 169.5 ± 155.0   | 138.2 ± 114.3             |

The CTRL and MCT diets were fed to the rats from PN day 2-42; WSD from PN day 43-98. Values are means ± SD. <sup>#</sup>p<0.1; \*p<0.01 compared to CTRL. iAUC, incremental area under the curve; dAUC, decremental area under the curve; HOMA-IR, homeostasis model assessment of insulin resistance.
